# Supplementary material for: Prednisolone induces apoptosis in corneal epithelial cells through the intrinsic pathway
Source: PubMed Central journal article supplement (PMC5482844; doi:10.1038/s41598-017-04509-8), 2017-06-23

# **Prednisolone induces apoptosis in corneal epithelial cells through the intrinsic pathway.**

Jin Suk Ryu,<sup>1</sup> Jung Hwa Ko,<sup>1</sup> Mee Kum Kim,<sup>1,2</sup> Won Ryang Wee,<sup>1,2</sup> and Joo Youn Oh<sup>1,2,\*</sup>

<sup>1</sup>Laboratory of Ocular Regenerative Medicine and Immunology, Biomedical Research Institute, Seoul National University Hospital, 101 Daehak-ro, Jongno-gu, Seoul 110-744, Korea

<sup>2</sup>Department of Ophthalmology, Seoul National University Hospital, 101 Daehak-ro, Jongno-gu, Seoul 110-744, Korea

\* [jooyounoh77@gmail.com](mailto:jooyounoh77@gmail.com)

**\*Correspondence to:** Joo Youn Oh, MD, PhD. Department of Ophthalmology, Seoul National University Hospital, 101 Daehak-ro, Jongno-gu, Seoul, 110-744, Korea. Tel: 82-2-2072-0836; Fax: 82-2-741-3187; E-mail: jooyounoh77@gmail.com

**Supplementary Figure 1. Effect of prednisolone on inflammatory cytokine expression in hCECs at steady state.** Real-time RT PCR analysis for inflammatory cytokines (TNF- $\alpha$ , IL-1 $\beta$ , IL-6, IL-12A, and TGF- $\beta$ 1) and epithelial stem cell-specific markers (P63 and ABCG2) in hCECs treated with various concentrations of prednisolone. Data are presented as mean + SD from five independent experiments.

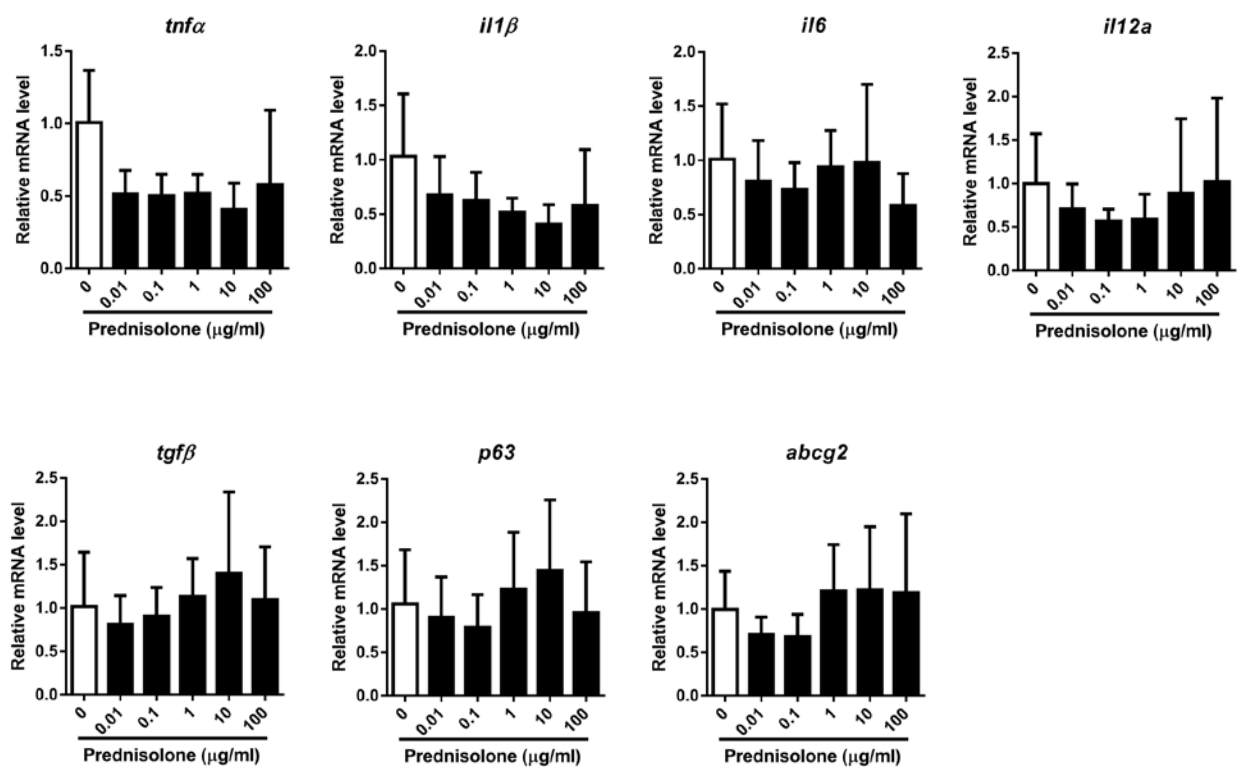

**Supplementary Figure 2. Effect of prednisolone on epithelial stem cell-specific markers in hCECs stimulated with hyperosmolarity.** Real-time RT PCR analysis for epithelial stem cell-specific markers (P63 and ABCG2) in hCECs treated by 100 mM NaCl in the presence or absence of prednisolone (10  $\mu$ g/ml) for 3 days. Data are presented as mean + SD from five independent experiments. \*\*  $p < 0.01$ .

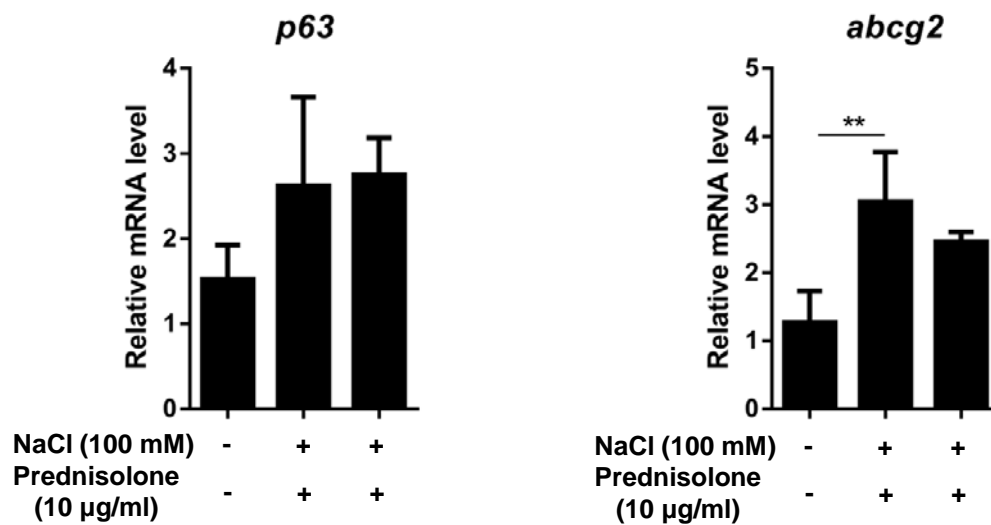

Supplement: 41598_2017_4509_MOESM1_ESM.pdf [file 41598_2017_4509_MOESM1_ESM.pdf]
